# Supplementary material
Source: PubMed Central journal article supplement (PMC3421527)
Supplement: JCM.00523-12_zjm999091802so1.pdf [file JCM.00523-12_zjm999091802so1.pdf]

**Supplement 1. Correlation between amount of blood used for UCP extraction and PCR positivity.**

|                                  | UCP-HHQ |                             |   |   | UCP-PF |                             |   |   |
|----------------------------------|---------|-----------------------------|---|---|--------|-----------------------------|---|---|
|                                  |         | no. of positive PCR replica |   |   |        | no. of positive PCR replica |   |   |
| ml blood used for UCP extraction | neg     | 1                           | 2 | 3 | neg    | 1                           | 2 | 3 |
| 2.0                              | 5       |                             |   |   | 5      |                             |   |   |
| 2.5                              | 4       | 1                           |   |   | 5      |                             |   |   |
| 3.0                              | 229     | 6                           | 2 | 4 | 227    | 9                           | 2 | 4 |
| 3.5                              | 16      |                             | 1 | 1 | 16     | 1                           | 1 |   |
| 3.8                              | 1       |                             |   |   |        | 1                           |   |   |
| 4.0                              | 68      | 4                           |   | 2 | 72     | 1                           |   | 2 |
| 4.5                              | 37      | 1                           |   |   | 38     |                             |   |   |
| 5.0                              | 79      | 2                           | 1 | 2 | 78     | 3                           | 2 | 1 |
| 5.5                              | 18      |                             |   |   | 16     | 2                           |   |   |
| 6.0                              | 5       |                             |   |   | 5      |                             |   |   |
| 6.5                              | 1       |                             |   |   | 1      |                             |   |   |
| 7.0                              | 5       |                             |   |   | 5      |                             |   |   |
| 7.5                              | 1       |                             |   |   | 1      |                             |   |   |
| 8.0                              | 1       |                             |   |   | 1      |                             |   |   |
| sum                              | 470     | 14                          | 4 | 9 | 470    | 17                          | 5 | 7 |
