# Supplementary material
Source: PubMed Central journal article supplement (PMC3421527)
Supplement: JCM.00523-12_zjm999091802so2.pdf [file JCM.00523-12_zjm999091802so2.pdf]

**Table S2: Summary of selected unclassified patients<sup>a</sup>**

| Patient code | IHE-PF          | IHE-HHQ         | UCP-PF          |                 | UCP-HHQ         |                 | no. of pos. samples | host <sup>d</sup> | Am <sup>e</sup> |
|--------------|-----------------|-----------------|-----------------|-----------------|-----------------|-----------------|---------------------|-------------------|-----------------|
|              | 1x <sup>b</sup> | 1x <sup>b</sup> | 1x <sup>b</sup> | 2x <sup>c</sup> | 1x <sup>b</sup> | 2x <sup>c</sup> |                     |                   |                 |
| M068 (n=6)   |                 |                 | 1               | 1               |                 | 1               | 3                   | n                 |                 |
| M074 (n=8)   |                 |                 |                 | 1               |                 | 1               | 2                   | n                 | P, V, A         |
| M077 (n=8)   | 1               | 1               |                 |                 |                 |                 | 2                   | n                 | P               |
| T155 (n=9)   | 1               | 2               |                 |                 | 1               |                 | 4                   | n, a, t           | P               |
| T161 (n=11)  | 1               |                 | 2               |                 |                 |                 | 3                   | a, t              | M               |
| T167 (n=12)  |                 | 1               | 1               |                 |                 |                 | 2                   | n, a, t           |                 |
| V080 (n=8)   |                 | 1               | 1               |                 | 1               | 1               | 3                   | n                 | V, P            |
| V093 (n=20)  |                 | 1               | 1               |                 | 2               |                 | 4                   | n, a, t           | M, V            |
| T160 (n=15)  |                 |                 |                 |                 | 2               |                 | 2                   | a                 | P               |

<sup>a</sup> Unclassified patients with more than one positive PCR method result; the number of positive PCR replicas are indicated below each method

<sup>b</sup> No. of single-positive PCR triplicates

<sup>c</sup> No. of double-positive PCR triplicates

<sup>d</sup> Host risk factors for IA: a, allogeneic stem cell transplantation; n, neutropenia; t, T-cell-suppressive therapy

<sup>e</sup> *Aspergillus* active antimycotic therapy. A, ambisome; M, micafungin; P, posaconazole; V, voriconazole.
